# Supplementary material for: Defining the regulon of genes controlled by σE, a key regulator of the cell envelope stress response in Streptomyces coelicolor
Source: PubMed Central journal article supplement (PMC6767563; doi:10.1111/mmi.14250), 2019-04-29
Supplement: MMI-112-461-s001.pdf [file MMI-112-461-s001.pdf]

## SUPPORTING INFORMATION

### **Defining the regulon of genes controlled by $\sigma^E$ , a key regulator of the cell envelope stress response in *Streptomyces coelicolor***

Ngat T. Tran, Xiaoluo Huang, Hee-Jeon Hong, Matthew J. Bush, Govind Chandra, Daniela Pinto, Maureen J. Bibb, Matthew I. Hutchings, Thorsten Mascher, and Mark J. Buttner\*

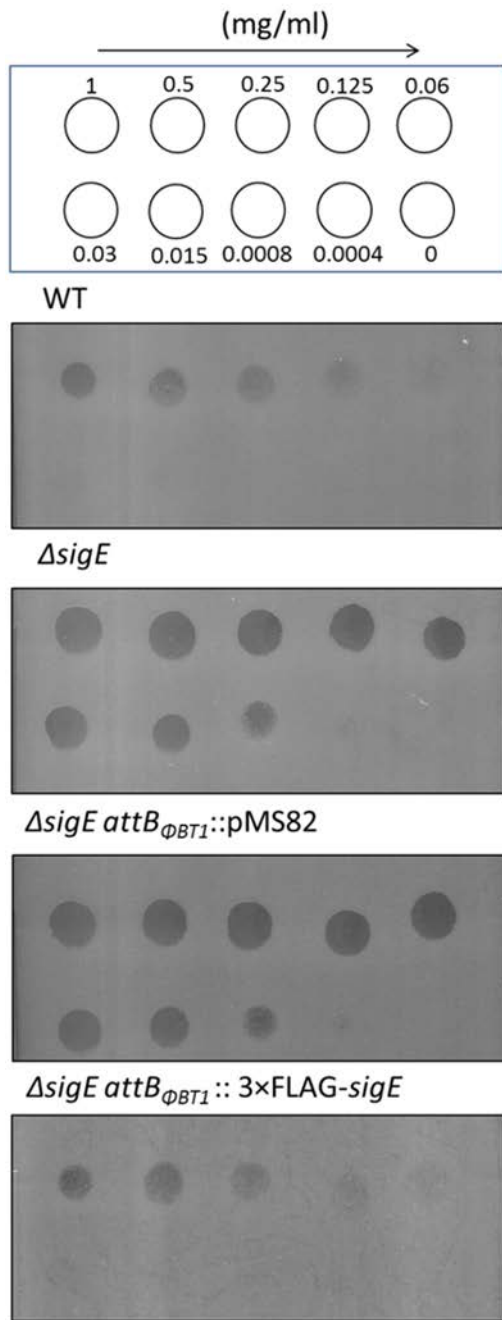

**Fig. S1.** Lysozyme sensitivity of wild-type *S. coelicolor* M600 (WT), the *sigE* null mutant J2130 ( $\Delta sigE$ ), J2130 harbouring the empty pMS82 vector ( $\Delta sigE attB_{\phi BT1}::pMS82$ ), and J2130 expressing the N-terminal, triple FLAG-tagged  $\sigma^E$  ( $\Delta sigE attB_{\phi BT1}::3\times FLAG-sigE$ ). 5  $\mu$ l lysozyme in a 2-fold dilution series was spotted onto DNA agar immediately after plating  $2\times 10^6$  spores of each strain to create a confluent lawn. Images were taken after 2 days of growth at 30°C.

■ WT      ▲  $\Delta sigE$

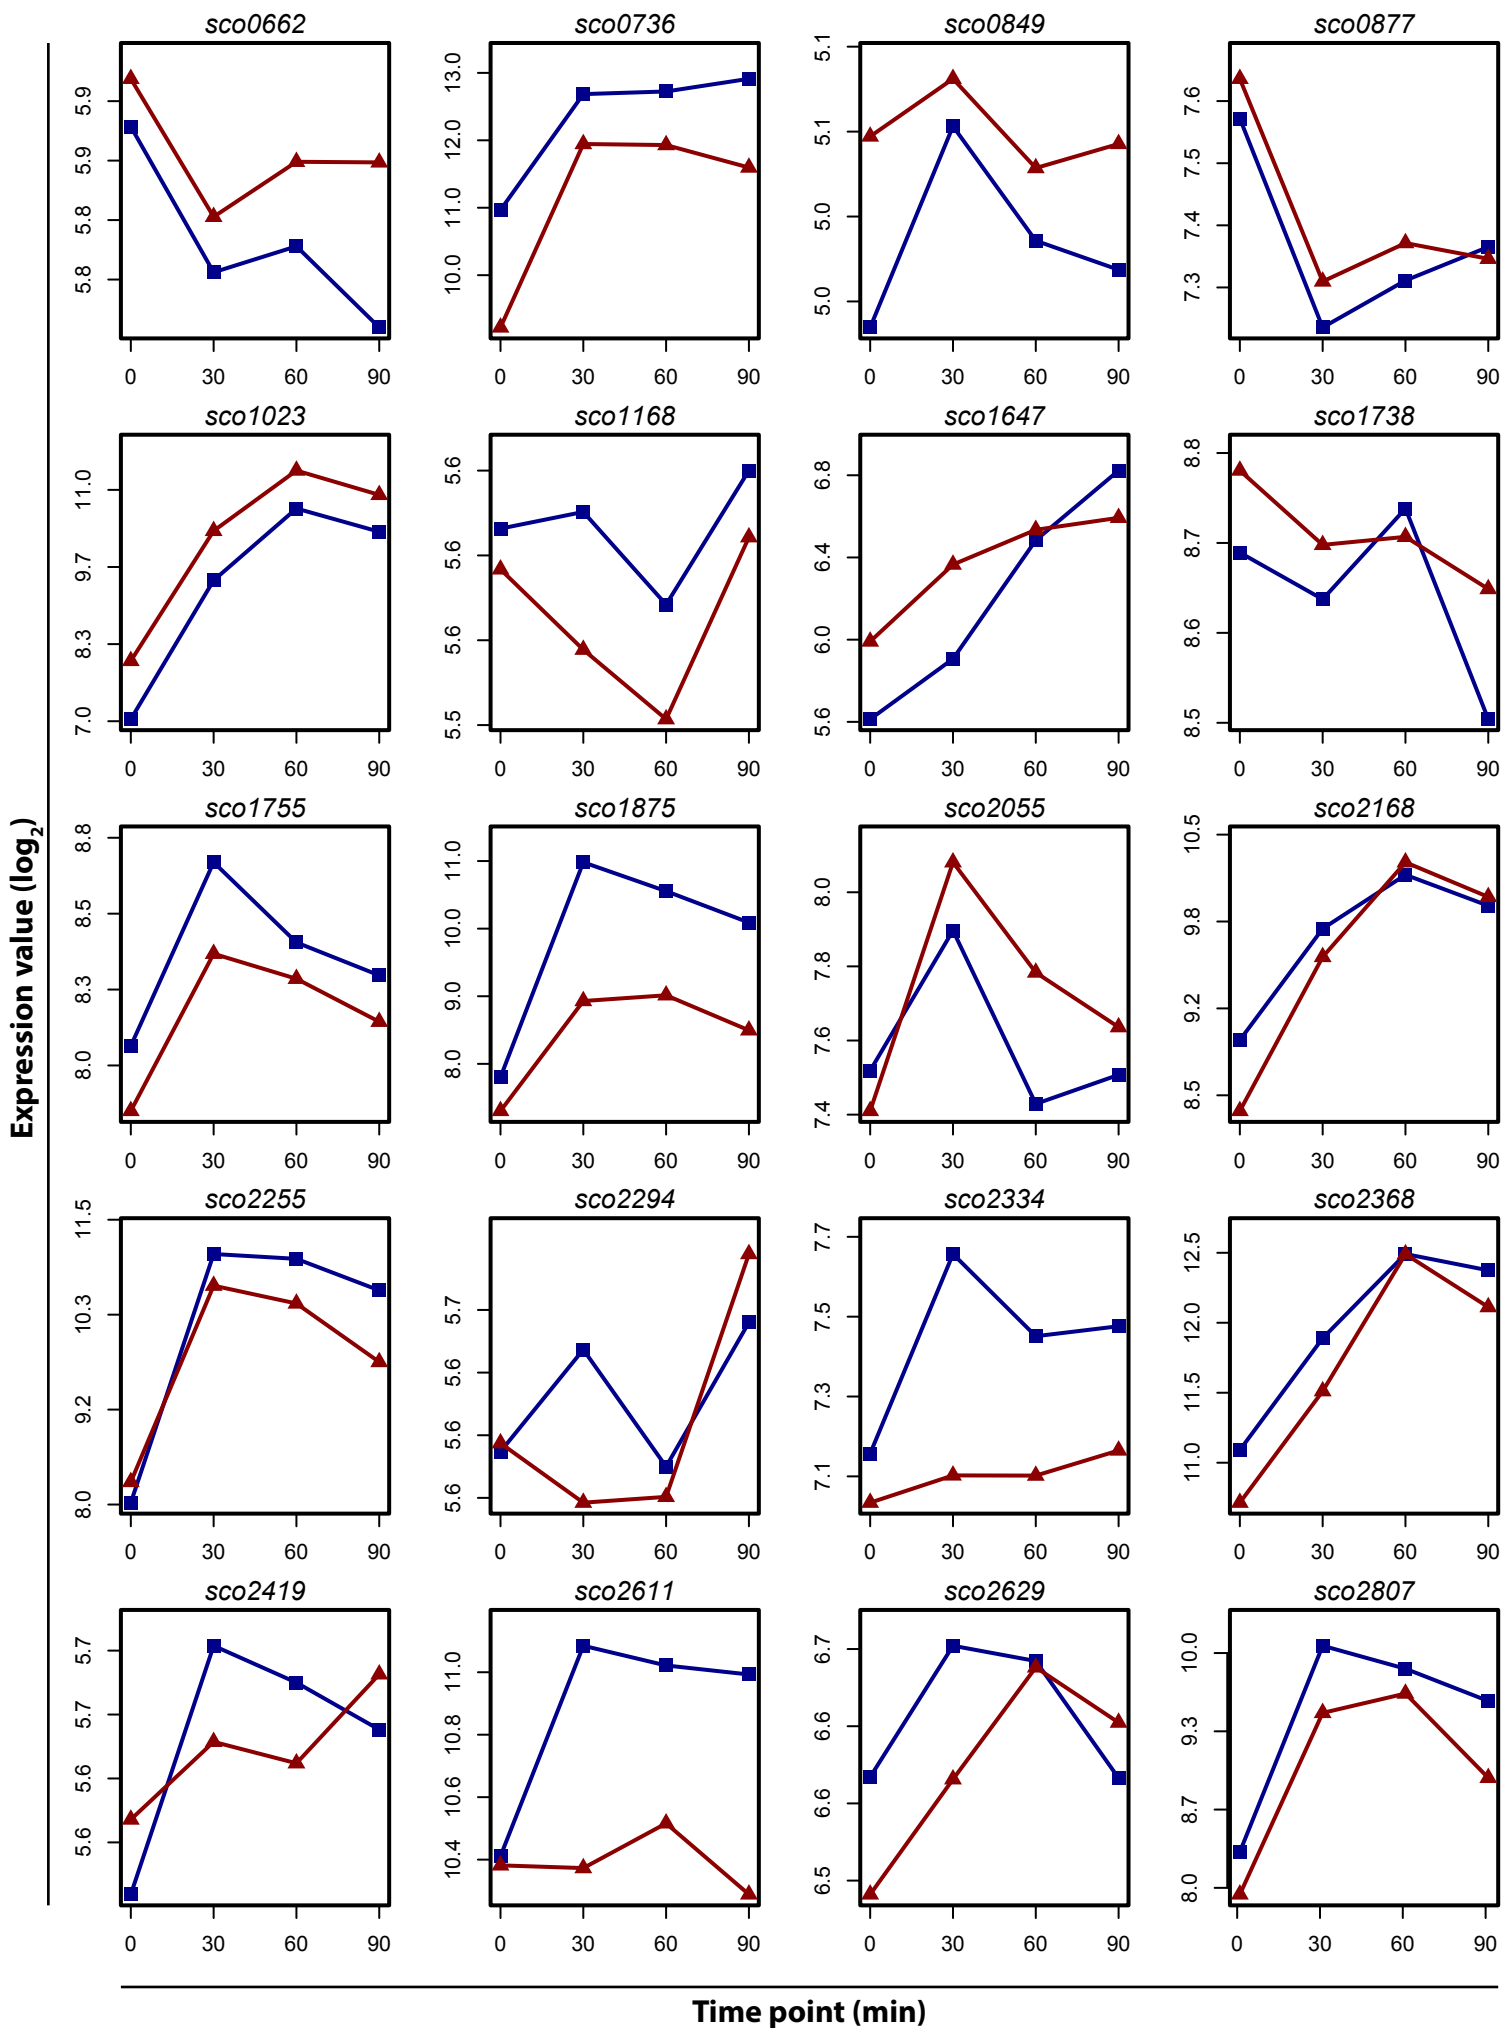

■ WT    ▲  $\Delta sigE$

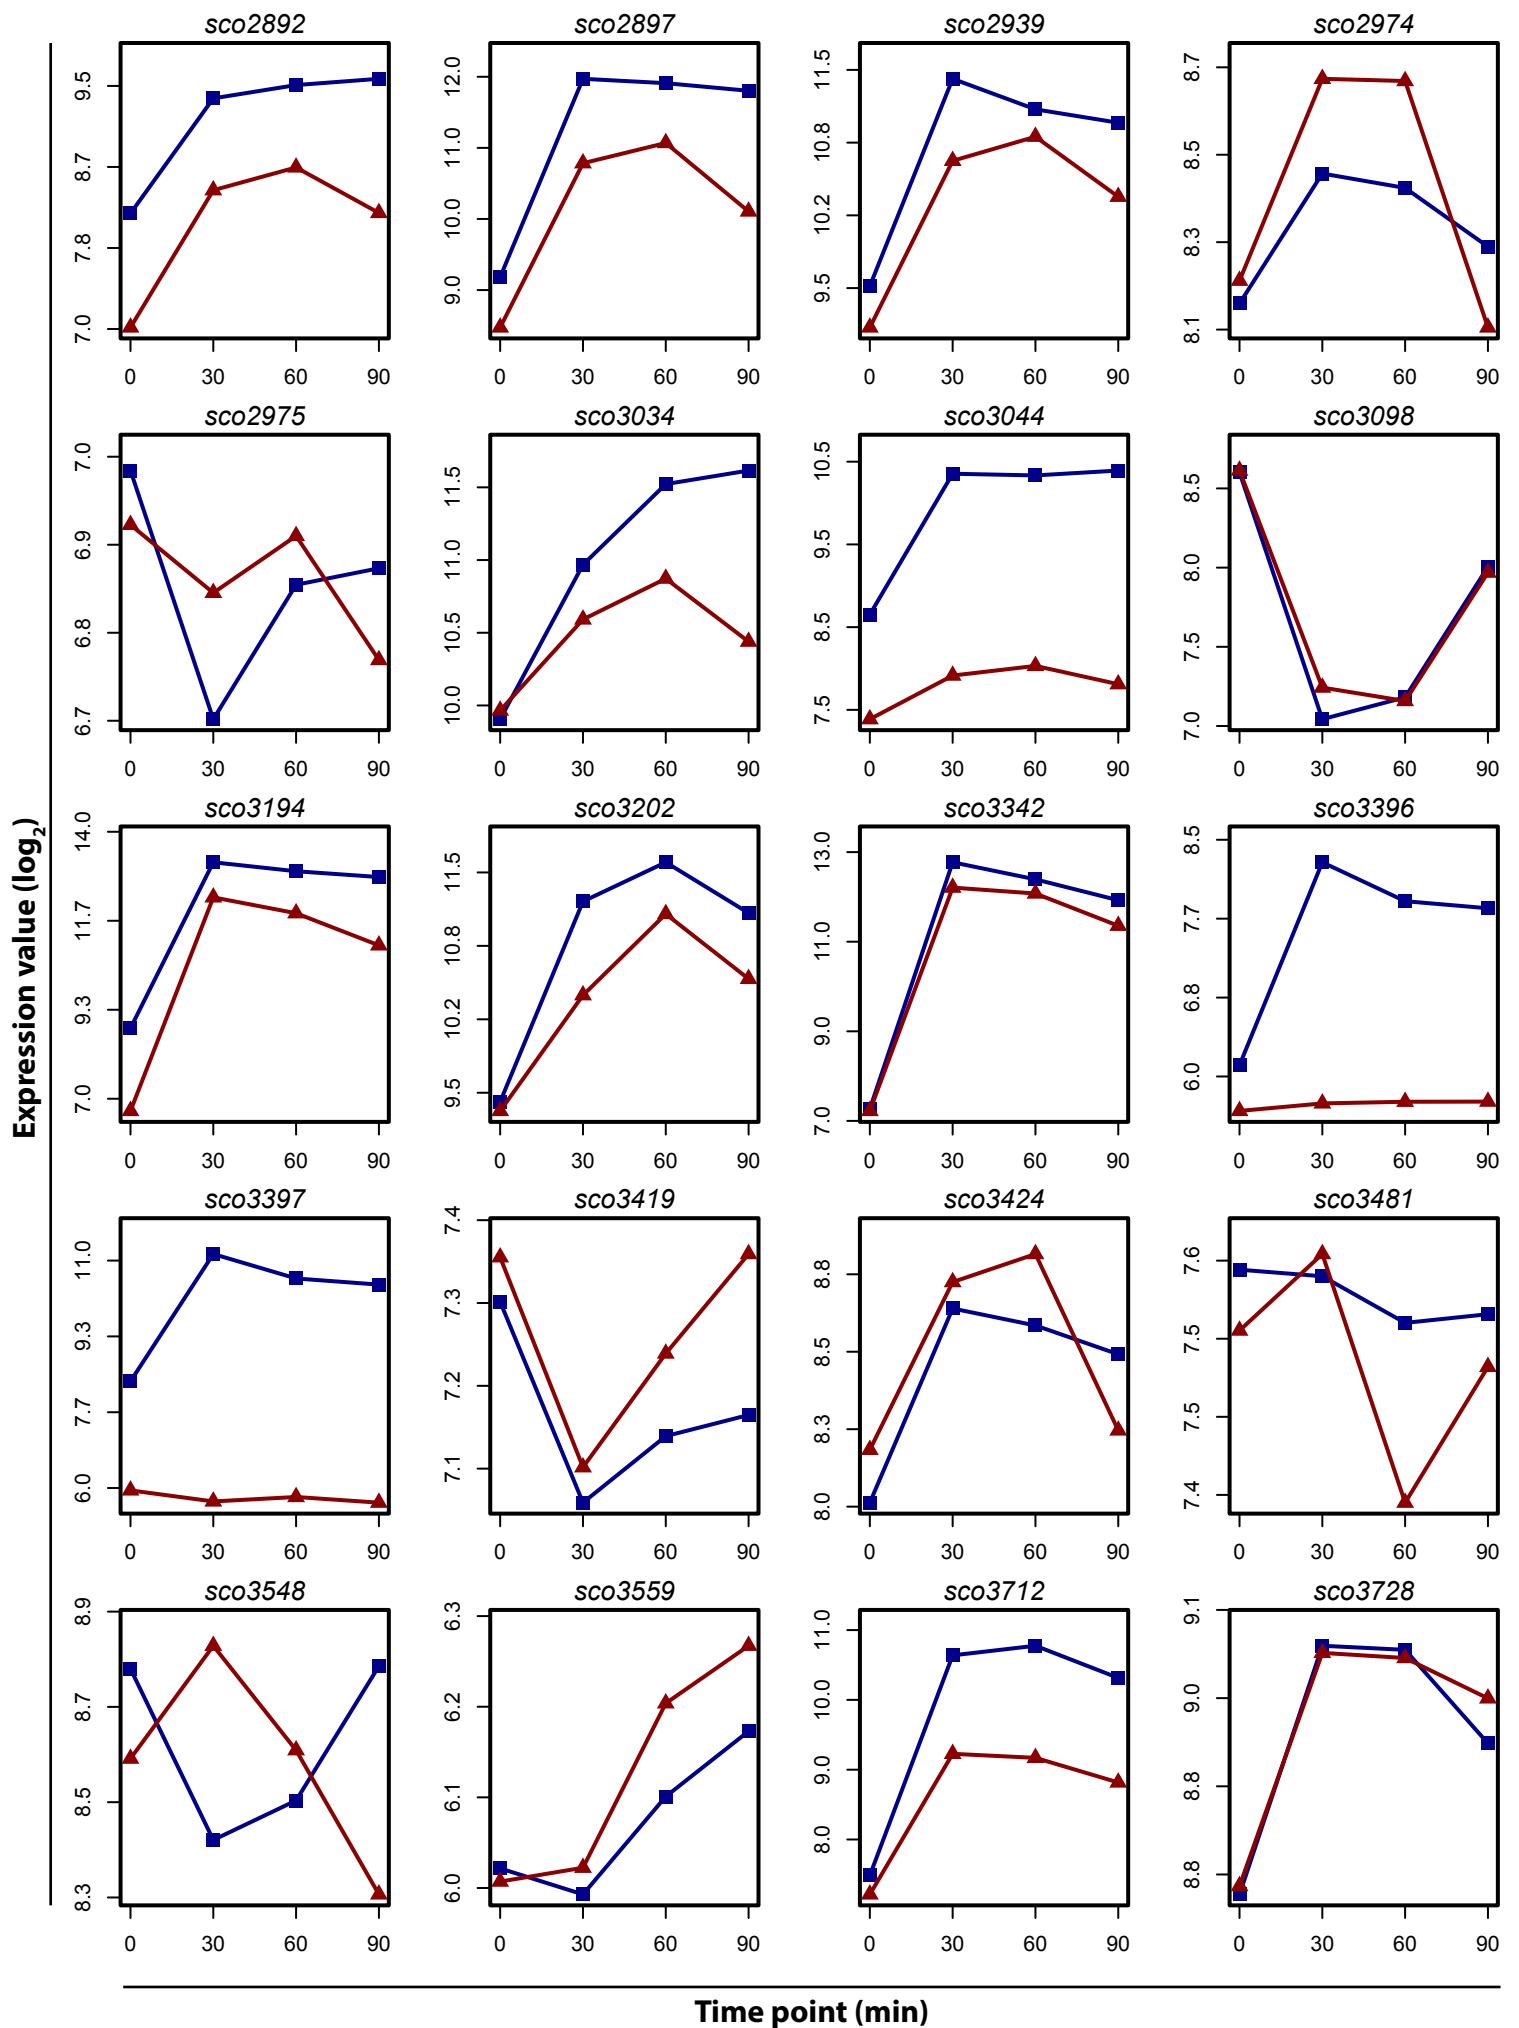

■ WT    ▲  $\Delta sigE$

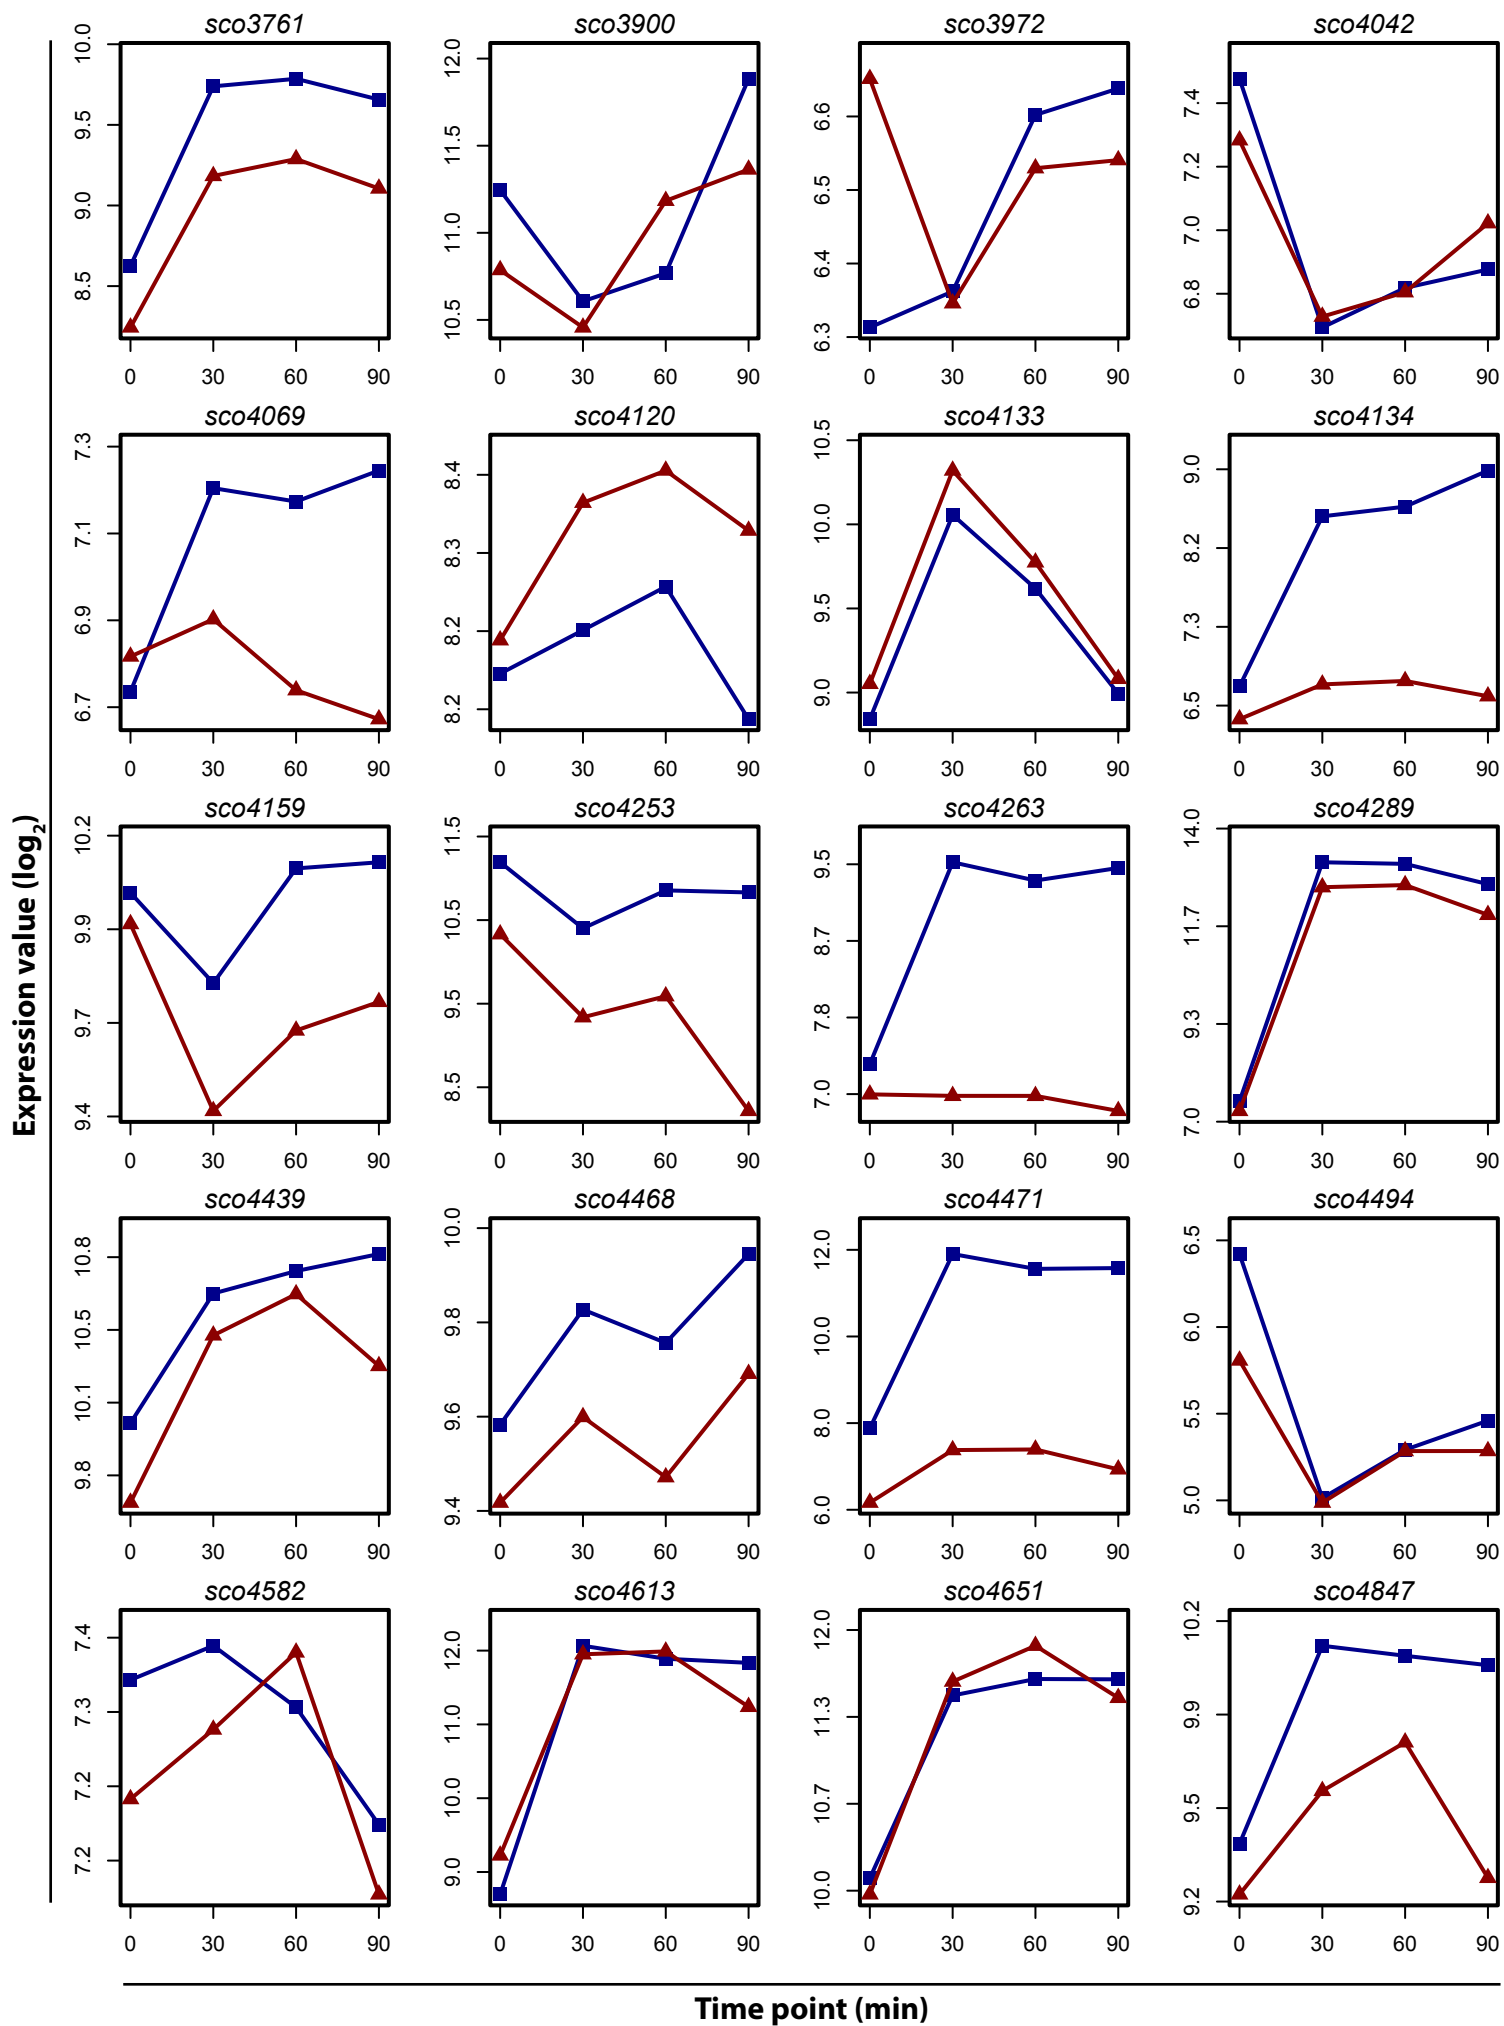

■ WT      ▲  $\Delta sigE$

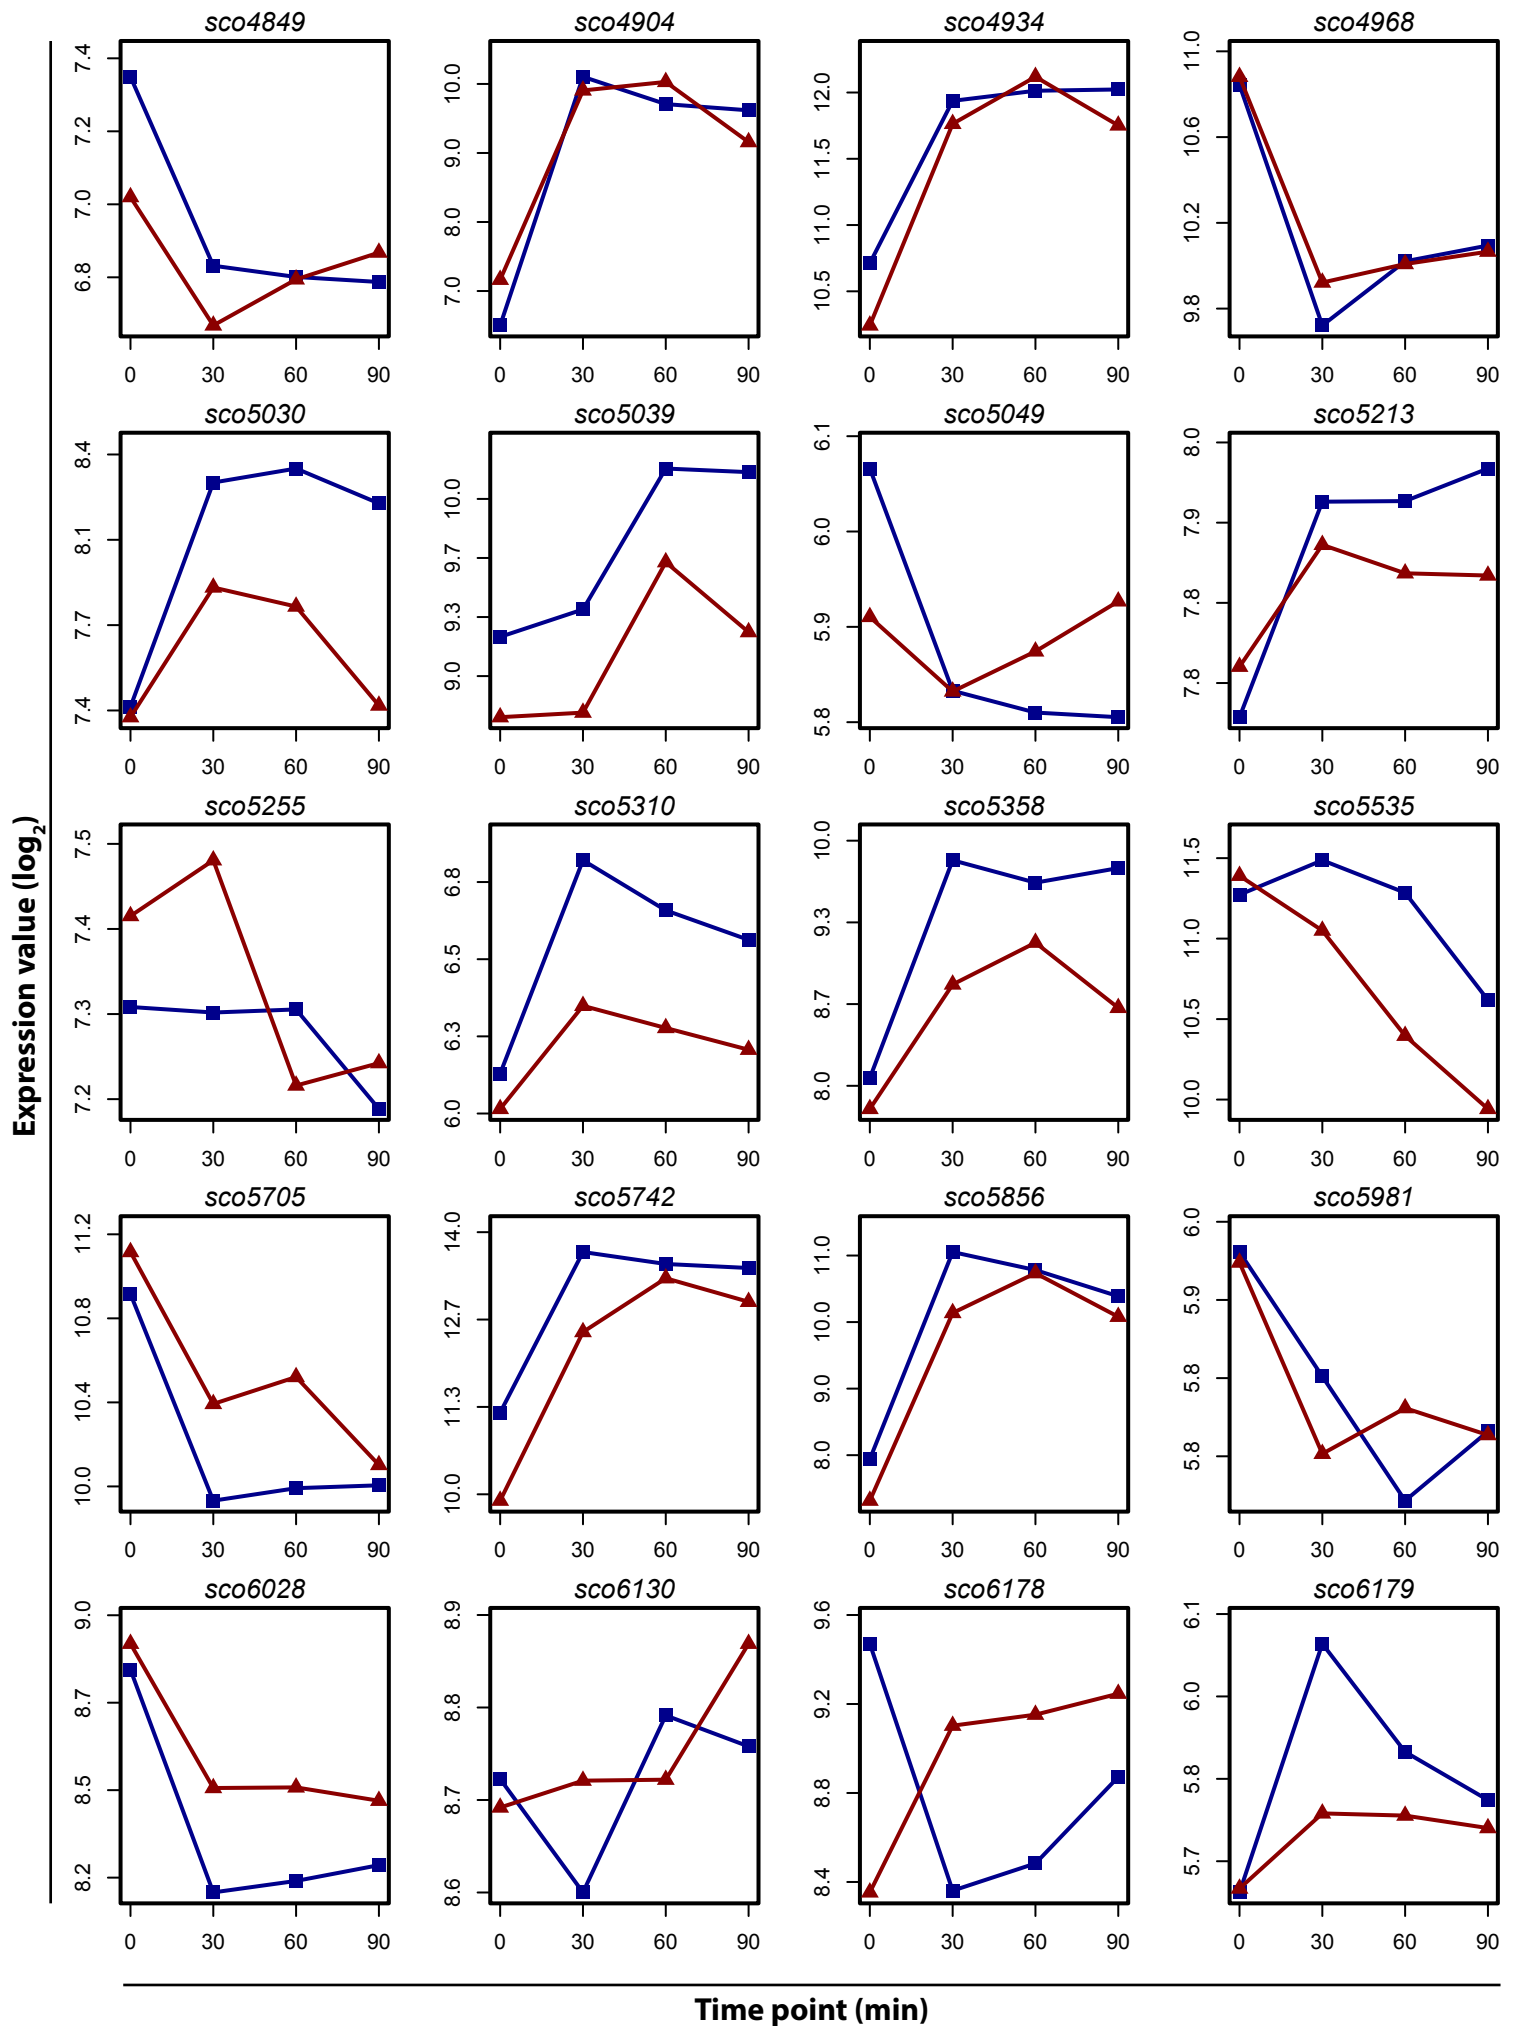

■ WT    ▲  $\Delta sigE$

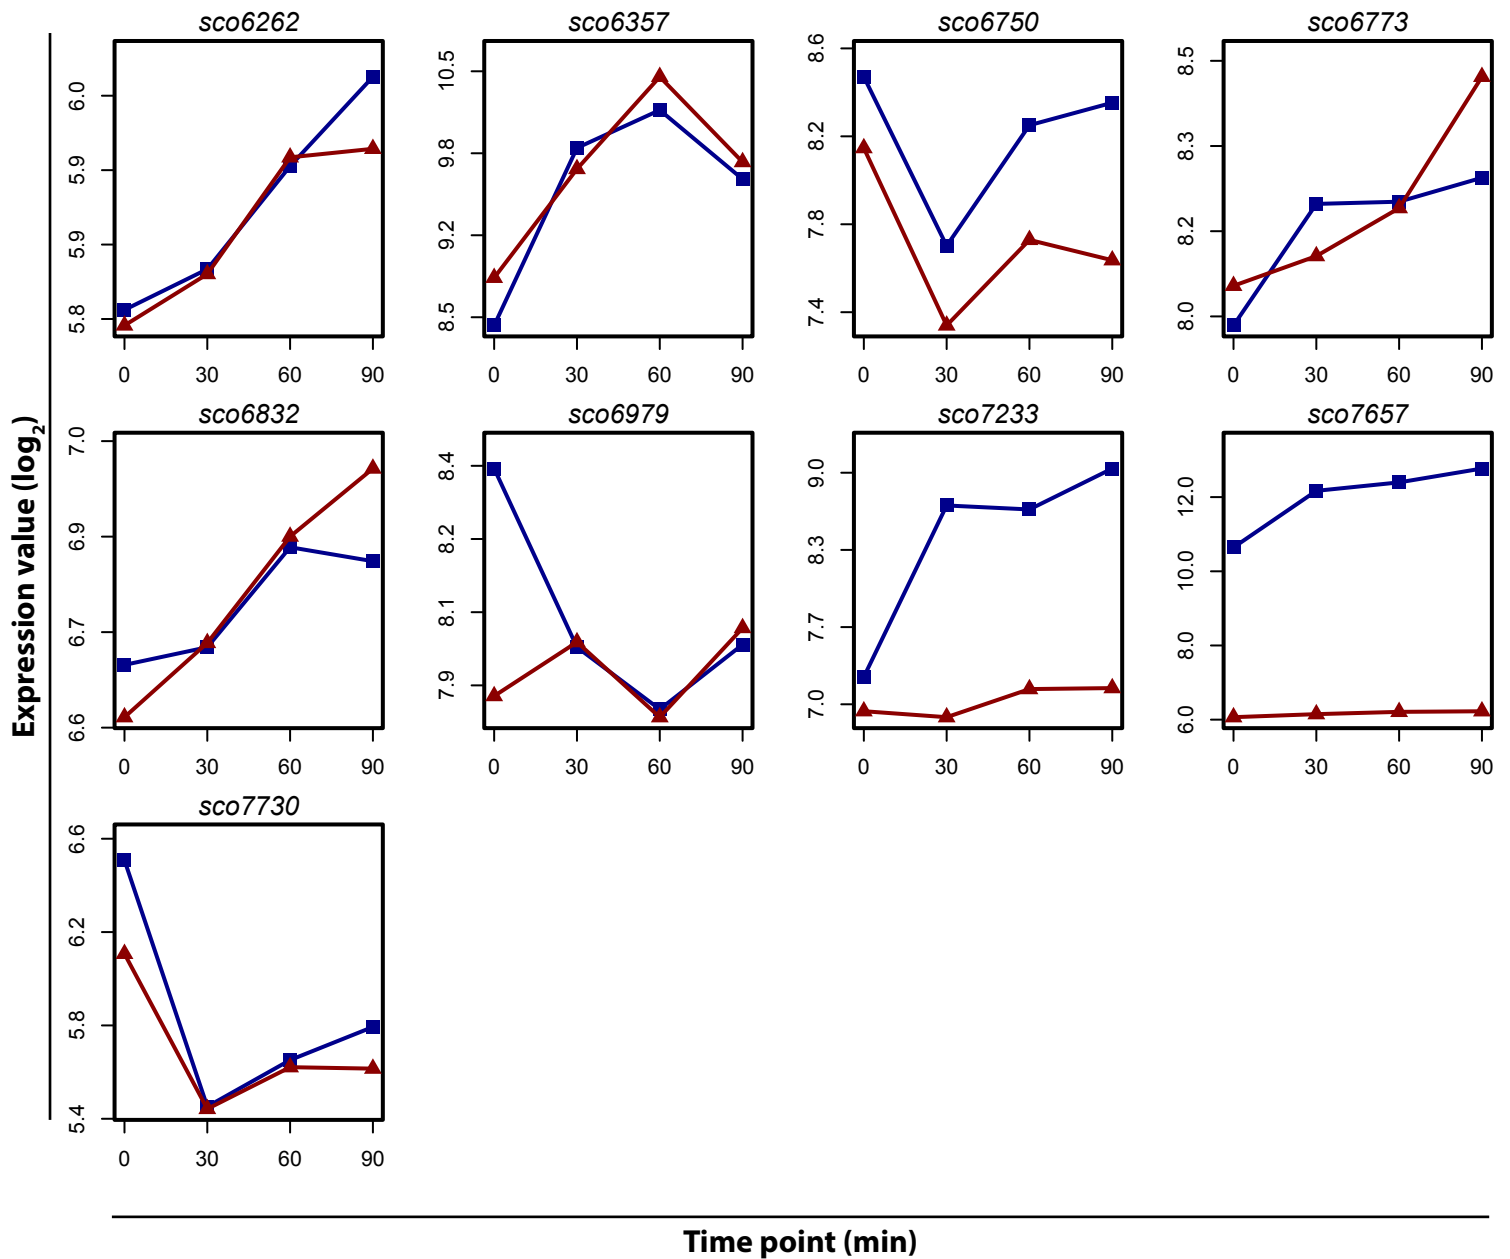

**Fig. S2.** Time-resolved microarray transcriptional profiling data for all the  $\sigma^E$  target genes listed in Table 1. Color-coding of the microarray data is as follows: *S. coelicolor* M600 (WT, blue squares), *sigE* null mutant J2130 ( $\Delta sigE$ , red triangles). In each panel the x-axis indicates the time in minutes (0, 30, 60 or 90) after the addition of 10  $\mu$ g/ml vancomycin, and the y-axis indicates the per gene normalized transcript abundance (log<sub>2</sub>). Note that two of the  $\sigma^E$  target genes listed in Table 1, the tRNA *scot11* and *sco6379*, were not represented on the Affymetrix Gene Chip and so no transcriptional profiling data are available for these two genes.

**A***Sco3396*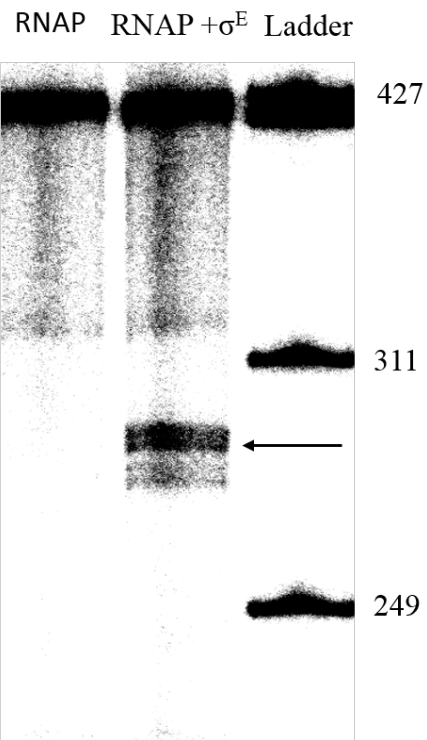**B***Sco4471*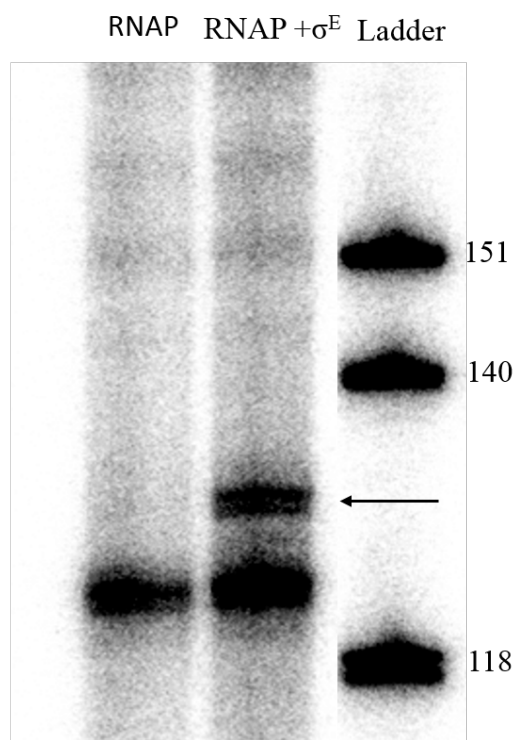

**Fig. S3.** *in vitro* run-off transcription assays on the  $\sigma^E$  target genes (A) *sco3396* and (B) *sco4471*. In each case a transcript of the expected size (indicated by the arrow) is only detected in the presence of RNAP and  $\sigma^E$ . The sizes of the standards (a heat-denatured  $^{32}\text{P}$ -labelled *Hpa*II digest of pBR322) are indicated in nt.



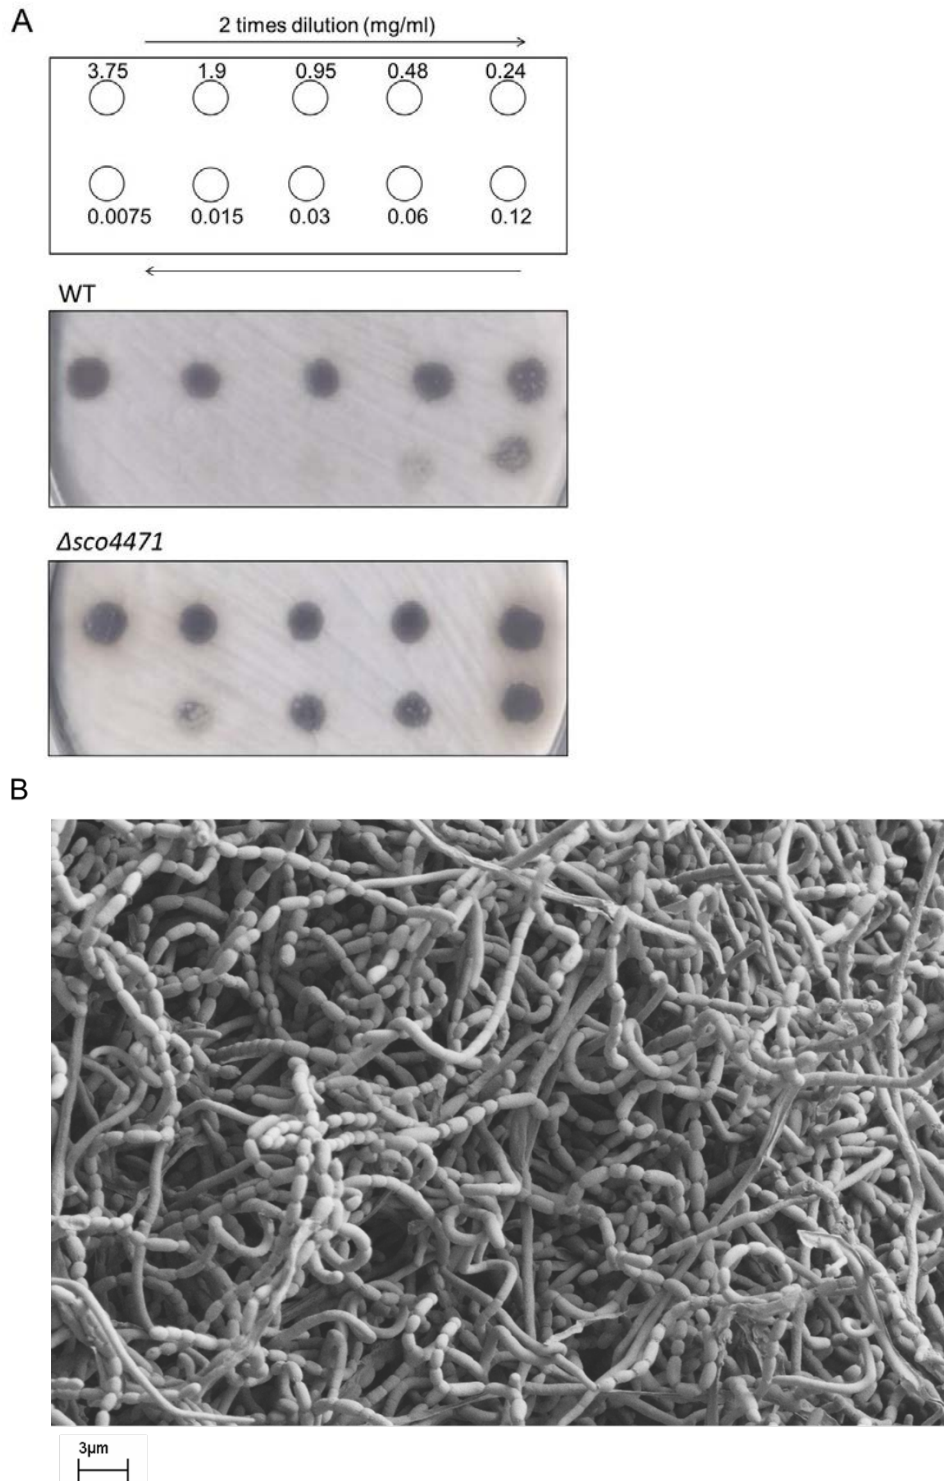

**Fig. S4.** (A) Lysozyme sensitivity of  $\Delta sco4471::apr$  mutant and the wild type *S. coelicolor* M600 (WT). A 2-fold dilution series of lysozyme was spotted onto DNA agar immediately after plating  $2 \times 10^6$  spores of each strain to create a confluent lawn. Images were taken after 2 days of growth at 30°C. (B) Scanning electron microscopy image of the  $\Delta sco4471::apr$  mutant showing minor abnormalities in spore size and shape. Imaged after 5 days of growth on SFM medium.

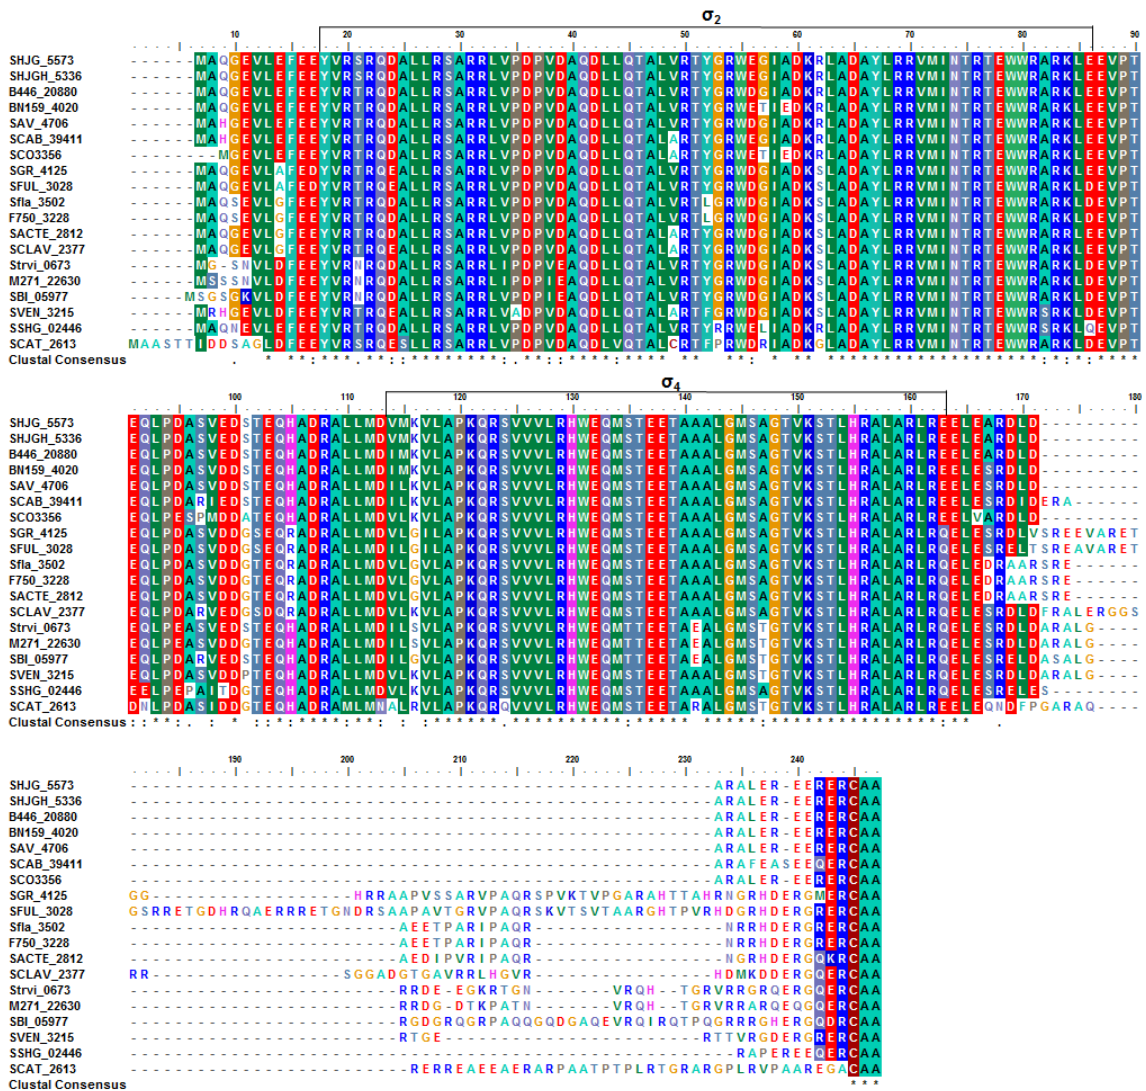

**Fig. S5.** Conservation of  $\sigma^E$  orthologs across 19 *Streptomyces* genomes. Multiple alignment of the amino acid sequences of the  $\sigma^E$  orthologs from 19 *Streptomyces* species (as listed in Table S2) were carried out by EMBL-EBI ClustalW2 online program (<http://www.ebi.ac.uk/Tools/msa/clustalw2/>). SCO3356 is *S. coelicolor*  $\sigma^E$ . The  $\sigma_2$  and  $\sigma_4$  domains were identified using the SMART database (<http://smart.embl-heidelberg.de/>) and are indicated in the figure.

**Table S2. The 19 *Streptomyces* genomes used to analyze conservation of *S. coelicolor*  $\sigma^E$  target promoters**

| <b>Accession<sup>1</sup></b> | <b>Species</b>                                                    | <b>Abbreviation</b> |
|------------------------------|-------------------------------------------------------------------|---------------------|
| CM000913                     | <i>Streptomyces clavuligerus</i> ATCC 27064                       | <i>Scla</i>         |
| NC_003155                    | <i>Streptomyces avermitilis</i> MA-4680 = NBRC 14893              | <i>Save</i>         |
| NC_003888                    | <i>Streptomyces coelicolor</i> A3(2)                              | <i>Scoe</i>         |
| NC_010572                    | <i>Streptomyces griseus</i> subsp. <i>griseus</i> NBRC 13350      | <i>Sgri</i>         |
| NC_013929                    | <i>Streptomyces scabiei</i> 87.22                                 | <i>Ssca</i>         |
| NC_015953                    | <i>Streptomyces</i> sp. SirexAA-E                                 | <i>SspS</i>         |
| NC_015957                    | <i>Streptomyces violaceusniger</i> Tu 4113                        | <i>Svio</i>         |
| NC_016111                    | <i>Streptomyces cattleya</i> NRRL 8057 = DSM 46488                | <i>Scat</i>         |
| NC_016114                    | <i>Streptomyces pratensis</i> ATCC 33331                          | <i>Spra</i>         |
| NC_016582                    | <i>Streptomyces bingchengensis</i> BCW-1                          | <i>Sbin</i>         |
| NC_017765                    | <i>Streptomyces hygrosopicus</i> subsp. <i>jinggangensis</i> 5008 | <i>Shyg_1</i>       |
| NC_018750                    | <i>Streptomyces venezuelae</i> ATCC 10712                         | <i>Sven</i>         |
| NC_020504                    | <i>Streptomyces davawensis</i> JCM 4913                           | <i>Sdav</i>         |
| NC_020895                    | <i>Streptomyces hygrosopicus</i> subsp. <i>jinggangensis</i> TL01 | <i>Shyg_2</i>       |
| NC_020990                    | <i>Streptomyces albus</i> J1074                                   | <i>Salb</i>         |
| NC_021055                    | <i>Streptomyces</i> sp. PAMC26508                                 | <i>SspP</i>         |
| NC_021177                    | <i>Streptomyces fulvissimus</i> DSM 40593                         | <i>Sful</i>         |
| NC_021985                    | <i>Streptomyces collinus</i> Tu 365                               | <i>Scol</i>         |
| NC_022785                    | <i>Streptomyces rapamycinicus</i> NRRL 5491                       | <i>Srap</i>         |

<sup>1</sup>The Genbank accession number (<http://www.ncbi.nlm.nih.gov/genbank/>) for the 19 *Streptomyces* genomes.

**Table S3. Bacterial strains, plasmids and oligonucleotides.**

|                             | Relevant genotype/comments                                                                                                                                                                             | Source/reference |
|-----------------------------|--------------------------------------------------------------------------------------------------------------------------------------------------------------------------------------------------------|------------------|
| <b><i>S. coelicolor</i></b> |                                                                                                                                                                                                        |                  |
| M600                        | SCP1 <sup>-</sup> SCP2 <sup>-</sup>                                                                                                                                                                    | (1)              |
| J2130                       | $\Delta sigE$ M600                                                                                                                                                                                     | (2)              |
| J3354                       | $\Delta SCO4471::apr$ M600                                                                                                                                                                             | This work        |
| <b><i>E. coli</i></b>       |                                                                                                                                                                                                        |                  |
| DH5 $\alpha$                | F <sup>+</sup> <i>supE44</i> $\Delta lacU169$ ( $\Phi 80lacZ$ $\Delta M15$ ) <i>hsdR17 recA1 endA1 gyrA96 thi-1 relA1</i>                                                                              | (3)              |
| ET12567                     | F <sup>+</sup> <i>dam13::Tn9 dcm6 hsdM hsdR recF143::Tn10 galK2 galT22 ara-14 lacY1 xyl-5 leuB6 thi-1 tonA31 rpsL hisG4 tsx-78 mtl-1 glnV44</i>                                                        | (4)              |
| ET12567 /pUZ8002            | ET12567 containing helper plasmid pUZ8002                                                                                                                                                              | (2)              |
| BW25113                     | <i>lacI<sup>q</sup> rrnB<sub>T14</sub> <math>\Delta lacZ_{WJ16}</math> hsdR514 <math>\Delta araBAD_{AH33}</math> <math>\Delta rhaBAD_{LD78}</math></i>                                                 | (5)              |
| BL21 (DE3) /pLysS           | F <sup>-</sup> <i>ompT gal dcm lon hsdS<sub>B</sub> (r<sub>B</sub><sup>-</sup>m<sub>B</sub><sup>-</sup>)</i> $\lambda$ (DE3 [ <i>lacI lacUV5-T7 gene 1 ind1 sam7 nin5</i> ]) pLysS (Cam <sup>R</sup> ) | (6)              |
| <b>Plasmid</b>              |                                                                                                                                                                                                        |                  |
| pMS82                       | Plasmid integrating at the $\Phi$ BT1 attachment site (Hyg <sup>R</sup> ) of <i>S. coelicolor</i>                                                                                                      | (7)              |
| pIJ773                      | Plasmid template used for the amplification of the <i>apr oriT</i> cassette in 'Redirect' PCR-targeting                                                                                                | (8)              |
| pIJ790                      | Modified $\lambda$ RED recombination plasmid [ <i>oriR101</i> ] [ <i>repA101(ts)</i> ] <i>araBp-gam-be-exo</i>                                                                                         | (8)              |
| pMS82-3FLAG- <i>sigE</i>    | pMS82 harboring 3 $\times$ FLAG- <i>sigE</i> driven by its native promoter                                                                                                                             | This work        |
| <b>Primer</b>               |                                                                                                                                                                                                        |                  |
|                             | <b>Primer sequences (5'-3')</b>                                                                                                                                                                        |                  |
| SCO3396S1FW                 | CGATGTCCAGCAGGCCGAC                                                                                                                                                                                    |                  |
| SCO3396S1RV                 | GGTGGCGAGCAGCAGACCG                                                                                                                                                                                    |                  |
| SCO3397S1FW                 | CCCAGAACGGCCCCGCACACTCCG                                                                                                                                                                               |                  |
| SCO3397S1RV                 | GACGAGCACGCAGGCGCGGCCGAC                                                                                                                                                                               |                  |
| SCO2897S1FW                 | CTGCCACGGAATTTACGGGTG                                                                                                                                                                                  |                  |
| SCO2897S1RV                 | TAGACGTTGGACTGCTTGGTG                                                                                                                                                                                  |                  |
| SCO4134S1FW                 | CCACGTAGCCGCAGGCAATC                                                                                                                                                                                   |                  |
| SCO4134S1RV                 | AGGTGAGTGCGGTGCGCGTTC                                                                                                                                                                                  |                  |
| SCO3194S1FW                 | TGGTGACGCGGGCGATCGTGC                                                                                                                                                                                  |                  |
| SCO3194S1RV                 | GCCGCAGGCGGTGAGGGTGAG                                                                                                                                                                                  |                  |
| SCO4471S1FW                 | CTCCGTCGGCTACACCGAGCCC                                                                                                                                                                                 |                  |
| SCO4471S1RV                 | GAACCGGTGCCGCAGCCCCGCGAG                                                                                                                                                                               |                  |
| SCO5030S1FW                 | GGCAAGTACGCCTCCGCGGGC                                                                                                                                                                                  |                  |
| SCO5030S1RV                 | TTCTCGCGGCGCTGCTCCAAC                                                                                                                                                                                  |                  |
| SCO7233S1FW                 | TCCAGCGACGACTGCCCGTTC                                                                                                                                                                                  |                  |
| SCO7233S1RV                 | TACGGATGCCGGGCCGCTG                                                                                                                                                                                    |                  |
| SCO2334S1FW                 | CGATGGAACCTTCCTCGCAAAG                                                                                                                                                                                 |                  |
| SCO2334S1RV                 | CGAGCAGCGGCACGCGATG                                                                                                                                                                                    |                  |
| SCO2611S1FW                 | GTCTGATCCTTCTTCGGGA                                                                                                                                                                                    |                  |
| SCO2611S1RV                 | TTGGCGGTCCCGAGGTCGAC                                                                                                                                                                                   |                  |
| SCO5358S1FW                 | CACCTACGCCTCCACCTG                                                                                                                                                                                     |                  |
| SCO5358S1RV                 | CGCGACGAGCAGGGCCTTG                                                                                                                                                                                    |                  |
| SCO4934S1FW                 | AGTGGGACCTCGACGAGGATG                                                                                                                                                                                  |                  |
| SCO4934S1RV                 | GGAACATGCCGAGAGCACCAG                                                                                                                                                                                  |                  |

---

|                           |                                    |
|---------------------------|------------------------------------|
| SCO3712S1FW               | ACCGTCGTCTACACGGCCG                |
| SCO3712S1RV               | ACCACCGTGCCGCGCCATG                |
| SCO4263S1FW               | TCCGGAGCGGACACCGCCAC               |
| SCO4263S1RV               | GCAGGACGAGGCGGCCGCTG               |
| SCO3044S1FW               | TCGCGCGTTTTGTCGAGTGCGCGAAGTGACCT   |
| SCO3044S1RV               | GCTGGTAGTAGAGGTATCCGG              |
| SCO7657S1FW               | CAACACCTTGCACGTGGTCACC             |
| SCO7657S1RV               | GAGTCCGGCGGTCACGGCCATG             |
| SCO4847S1FW               | CGTCGTATCCCCTCGGTTG                |
| SCO4847S1RV               | ACGGACTCGTCGACGGGCTC               |
| SCO4471KOFW               | CCAGTGACCACCAAGGACGCGACGAACGAG     |
|                           | GTTGCGATGATTCCGGGGATCCGTCGACC      |
| SCO4471KORV               | GGAAACCCGCATTTACAGGCACCGTTTCGCGG   |
|                           | TCGCTTCATGTAGGCTGGAGCTGCTTC        |
| P1 <sub>3NFLAG-SigE</sub> | AAAAAAGCTTACCAGGTGTGGCAGGAGC       |
| P2 <sub>3NFLAG-SigE</sub> | TCGATGTTCGTGGTTCCTTGTAGTCGCCGTCGTG |
|                           | GTCCTTGTAGTCCATGTCAACCGCCTTCCG     |
| P3 <sub>3NFLAG-SigE</sub> | CGACTACAAGGACCACGACATCGACTACAAG    |
|                           | GACGATGACGACAAG                    |
|                           | GGCGAGGTGCTCGAGTTC                 |
| P4 <sub>3NFLAG-SigE</sub> | AAAAGGTACCCACCGCCGTACTIONCGCC      |

---

## References

1. Chakraborty, R., and Bibb, M.J. (1997) The ppGpp synthetase gene (*relA*) of *Streptomyces coelicolor* A3(2) plays a conditional role in antibiotic production and morphological differentiation. *J. Bacteriol.* **179**: 5854-5861.
2. Paget, M.S., Chamberlin, L., Atrih, A., Foster, S.J., and Buttner, M.J. (1999) Evidence that the extracytoplasmic function sigma factor  $\sigma^E$  is required for normal cell wall structure in *Streptomyces coelicolor* A3(2). *J Bacteriol* **181**: 204-211.
3. Hanahan D. 1983. Studies on transformation of *Escherichia coli* with plasmids. *J Mol Biol* **166**: 557-580.
4. MacNeil, D.J., Gewain, K.M., Ruby, C.L., Dezeny, G., Gibbons, P.H., and MacNeil, T. (1992) Analysis of *Streptomyces avermitilis* genes required for avermectin biosynthesis utilizing a novel integration vector. *Gene* **111**: 61-68.
5. Datsenko, K.A., and Wanner, B.L. (2000) One-step inactivation of chromosomal genes in *Escherichia coli* K-12 using PCR products. *Proc Natl Acad Sci USA* **97**: 6640-6645.
6. Studier, F.W., and Moffatt, B.A. (1986) Use of bacteriophage T7 RNA polymerase to direct selective high-level expression of cloned genes. *J Mol Biol* **189**: 113-130.
7. Gregory, M.A., Till, R., and Smith, M.C. (2003) Integration site for *Streptomyces* phage  $\phi$ BT1 and development of site-specific integrating vectors. *J Bacteriol* **185**: 5320-5323.
8. Gust, B., Challis, G.L., Fowler, K., Kieser, T., and Chater, K.F. (2003) PCR-targeted *Streptomyces* gene replacement identifies a protein domain needed for biosynthesis of the sesquiterpene soil odor geosmin. *Proc Natl Acad Sci USA* **100**: 1541-1546.
